# Supplementary material for: Polymorphismsof the CD24 Gene Are Associated with Risk of Multiple Sclerosis: A Meta-Analysis
Source: PubMed Central journal article supplement (PMC4490449; doi:10.3390/ijms160612368), 2015-06-01
Supplement: ijms-16-12368-s001.pdf [file ijms-16-12368-s001.pdf]

## Supplementary Information

**Table S1.** Studies reporting data on genotypes and alleles for the association of association of the 226C>T polymorphism of the *CD24* gene with MS.

| Author          | Year | Ethnicity | RACE      | T <sup>a</sup> | NT <sup>b</sup> | Controls |     |     |     |      |       | Cases |    |     |     |      |       |
|-----------------|------|-----------|-----------|----------------|-----------------|----------|-----|-----|-----|------|-------|-------|----|-----|-----|------|-------|
|                 |      |           |           |                |                 | TT       | TC  | CC  | T   | C    | Total | TT    | TC | CC  | T   | C    | Total |
| Zhou Q.         | 2003 | USA       | Caucasian | 13             | 2               | 13       | 85  | 109 | 111 | 303  | 207   | 32    | 97 | 113 | 161 | 323  | 242   |
| Cui Y.Z.        | 2006 | China     | Asian     |                |                 | 11       | 51  | 48  | 73  | 147  | 83    | 16    | 42 | 25  | 74  | 92   | 110   |
| Goris A.Belgium | 2006 | Belgium   | Caucasian |                |                 | 29       |     |     | 192 | 452  | 322   | 39    |    |     | 211 | 457  | 334   |
| Goris A.UK      | 2006 | UK        | Caucasian |                |                 | 98       |     |     | 576 | 1116 | 846   | 74    |    |     | 509 | 1183 | 846   |
| Otaegui D.      | 2006 | Spain     | Caucasian |                |                 | 4        | 136 | 145 | 144 | 426  | 285   | 7     | 69 | 59  | 83  | 187  | 141   |
| Ronaghi M.      | 2009 | Iran      | Caucasian |                |                 | 20       | 66  | 114 | 106 | 294  | 200   | 47    | 68 | 102 | 162 | 272  | 217   |
| Gonzalez S.J.   | 2011 | Argentina | Caucasian |                |                 | 18       | 91  | 96  | 127 | 283  | 205   | 9     | 50 | 43  | 68  | 136  | 102   |
| Kollaee A.      | 2011 | Iran      | Caucasian |                |                 | 8        | 49  | 63  | 65  | 175  | 120   | 24    | 40 | 56  | 88  | 152  | 120   |

<sup>a</sup> T: Transmitted; <sup>b</sup> NT: Non-transmitted.

**Table S2.** Studies reporting data on genotypes and alleles for the association of association of 1527–1528 TG>del polymorphism of CD24 gene with MS.

| Author        | Year | Ethnicity | RACE      | Controls |        |         |     |     |       | Cases |        |         |     |     |       |
|---------------|------|-----------|-----------|----------|--------|---------|-----|-----|-------|-------|--------|---------|-----|-----|-------|
|               |      |           |           | TG/TG    | TG/del | del/del | TG  | del | Total | TG/TG | TG/del | del/del | TG  | del | Total |
| Wang L        | 2007 | USA       | Caucasian | 354      | 84     | 5       | 792 | 94  | 443   | 242   | 32     | 1       | 516 | 34  | 275   |
| Gonzalez S.J. | 2011 | Argentina | Caucasian | 182      | 23     | 0       | 387 | 24  | 205   | 94    | 7      | 1       | 195 | 9   | 102   |

**Table S3.** Studies reporting data on genotypes and alleles for the association of association of 1056 A>G polymorphism of CD24 gene with MS.

| Author        | Year | Ethnicity | RACE      | Controls |     |     |     |     |       | Cases |     |     |     |     |       |
|---------------|------|-----------|-----------|----------|-----|-----|-----|-----|-------|-------|-----|-----|-----|-----|-------|
|               |      |           |           | A/A      | A/G | G/G | A   | G   | Total | A/A   | A/G | G/G | A   | G   | Total |
| Wang L        | 2007 | USA       | Caucasian | 128      | 215 | 100 | 471 | 415 | 443   | 76    | 131 | 68  | 283 | 267 | 275   |
| Gonzalez S.J. | 2011 | Argentina | Caucasian | 61       | 103 | 41  | 225 | 185 | 205   | 26    | 58  | 94  | 110 | 246 | 102   |

**Table S4.** Studies reporting data on genotypes and alleles for the association of association of 1626 A>G polymorphism of CD24 gene with MS.

| Author        | Year | Ethnicity | RACE      | Controls |     |     |     |     |       | Cases |     |     |     |    |       |
|---------------|------|-----------|-----------|----------|-----|-----|-----|-----|-------|-------|-----|-----|-----|----|-------|
|               |      |           |           | A/A      | A/G | G/G | A   | G   | Total | A/A   | A/G | G/G | A   | G  | Total |
| Wang L        | 2007 | USA       | Caucasian | 301      | 128 | 14  | 730 | 156 | 443   | 200   | 70  | 5   | 470 | 80 | 275   |
| Gonzalez S.J. | 2011 | Argentina | Caucasian | 160      | 43  | 2   | 363 | 47  | 205   | 94    | 18  | 1   | 206 | 20 | 102   |
